# Supplementary material for: Design of an interface heating device based on polydivinylbenzene/SiO2/Bi2WO6and its visible light response performance for water purification
Source: Royal Society of Chemistry journal article supplement (doi:10.1039/d2cp04877a), 2023-01-01
Supplement: d2cp04877a1.pdf [file d2cp04877a1.pdf]

Design of interface heating device based on polydivinylbenzene/SiO<sub>2</sub>/Bi<sub>2</sub>WO<sub>6</sub> and its  
visible light response performance for water purification

Xiao Miao<sup>a\*</sup>, Ling Zhao<sup>a</sup>, Guina Ren<sup>b</sup>, Yunlong Pang<sup>c</sup>, Hui Xin<sup>c</sup>, Bo Ge<sup>c\*</sup>, Cancan Liu<sup>d</sup>

<sup>a</sup> Shandong Key Laboratory of Optical Communication Science and Technology, School of Physics Science and Information Technology, Liaocheng University, Liaocheng 252000, China.

<sup>b</sup> School of Environmental and Material Engineering, Yantai University, Yantai 264405, China.

<sup>c</sup> School of Materials Science and Engineering, Liaocheng University, Liaocheng 252000, China.

<sup>d</sup> College of Materials Science and Engineering, Nanjing Tech University, Nanjing, 211816, China.

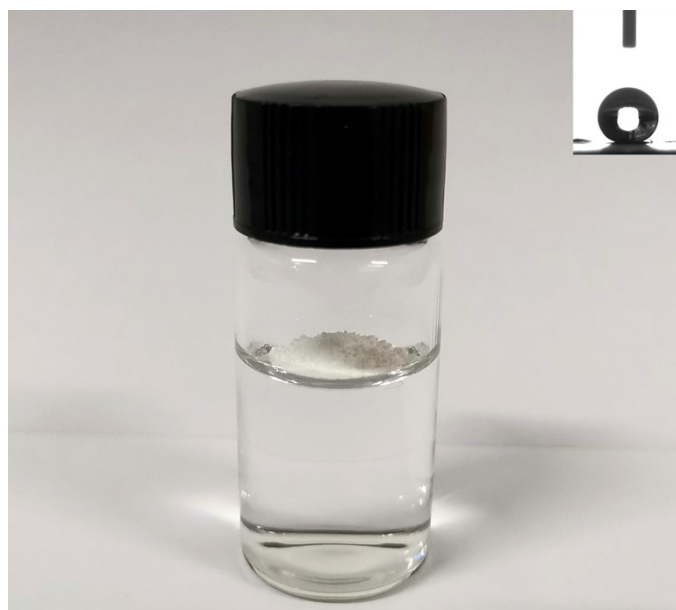

**Fig. S1** Behavior of PDVB/SiO<sub>2</sub> in water and the contact angle analysis.

---

\* Corresponding authors.

E-mail addresses: [miaoxiao@lcu.edu.cn](mailto:miaoxiao@lcu.edu.cn) (X. Miao); [gebo11@163.com](mailto:gebo11@163.com) (B. Ge)

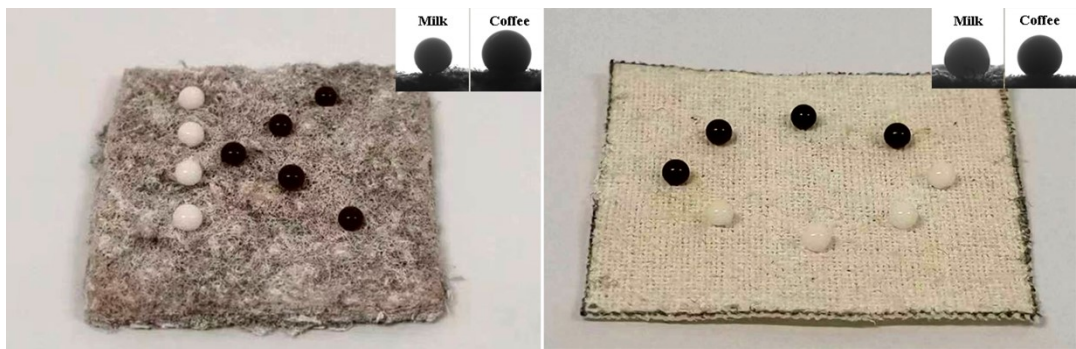

**Fig. S2** The wetting behavior of milk and coffee on superhydrophobic fabric/felt.

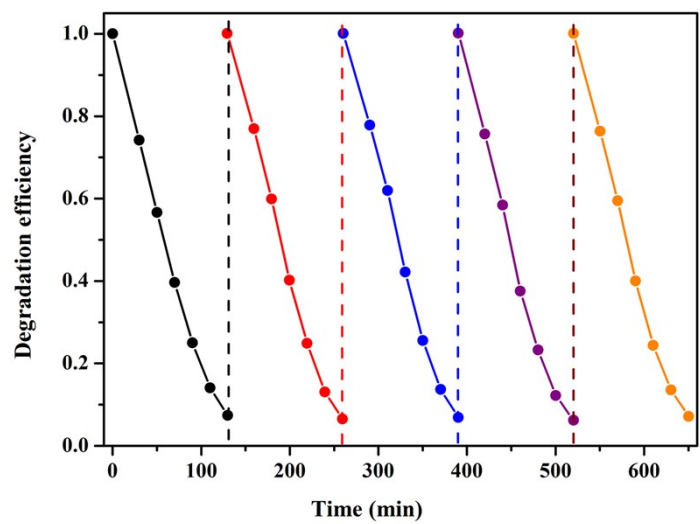

**Fig. S3** Indoor photodegradation with a AM 1.5 filter.

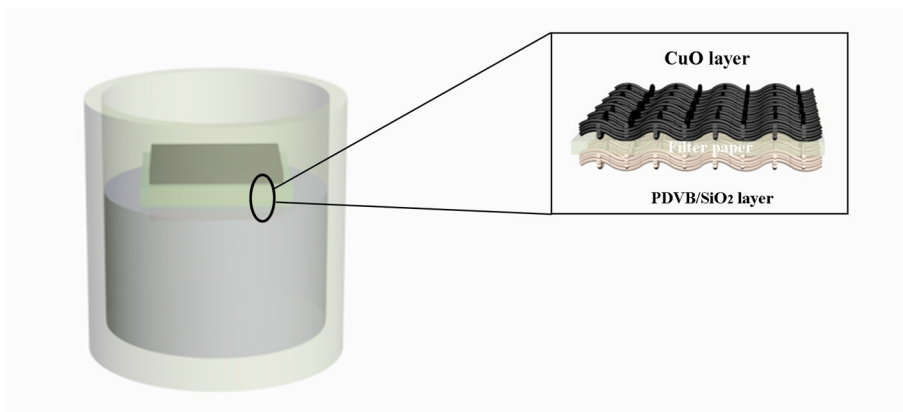

**Fig. S4** A schematic diagram of the assembled device.

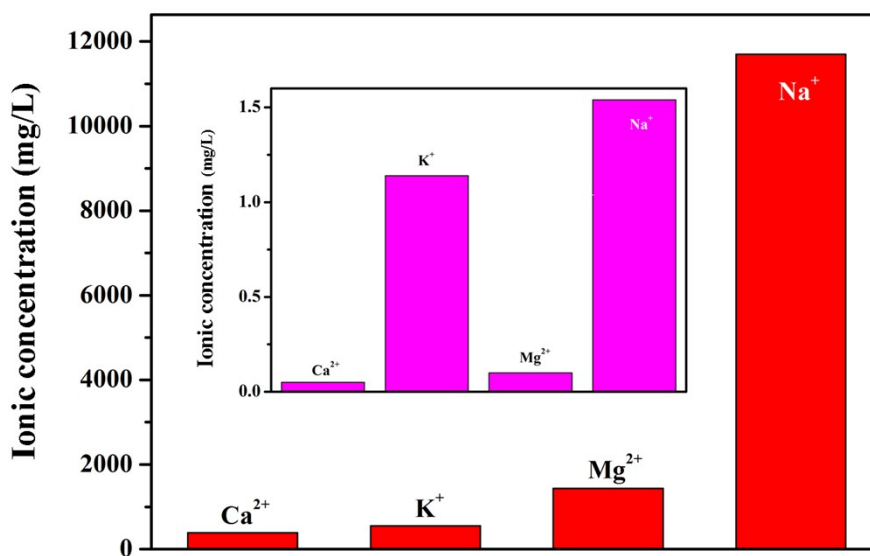

**Fig. S5** Comparison of the ion concentrations in the initial liquid and the collected fluids.

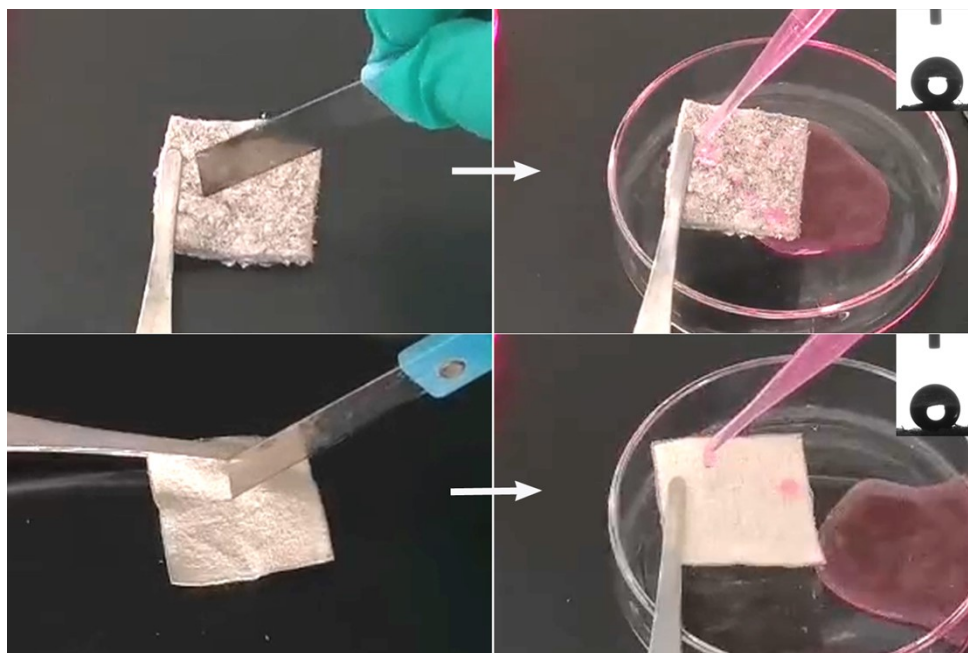

**Fig. S6** The wettability of fabric and felt after the surface was destroyed.
