# Supplementary material for: Design of an interface heating device based on polydivinylbenzene/SiO2/Bi2WO6and its visible light response performance for water purification
Source: Royal Society of Chemistry journal article supplement (doi:10.1039/d2cp04877a), 2023-01-01
Supplement: d2cp04877a2.pdf [file d2cp04877a2.pdf]

**Table S1** Summary of the existing literature

| Reference | Material                                                               | Method                           | Property                                | Evaporation rate                          |
|-----------|------------------------------------------------------------------------|----------------------------------|-----------------------------------------|-------------------------------------------|
| [1]       | Janus structure: carbon fiber powder and insulated aramid fiber powder | Freeze-drying                    | Solar desalination                      | 1.25 kg•m <sup>-2</sup> •h <sup>-1</sup>  |
| [2]       | Janus composite: vermiculite, MWCNTs and polydimethylsiloxane          | Layer by layer deposition method | Solar desalination and soil remediation | 1.48 kg•m <sup>-2</sup> •h <sup>-1</sup>  |
| [3]       | Ferric tannate/gallate polyurethane sponge                             | Polymerization                   | Solar desalination                      | 1.76 kg•m <sup>-2</sup> •h <sup>-1</sup>  |
| [4]       | Au/Ag cellulose-based membranes                                        | Polymerization                   | Solar desalination                      | 1.31 kg•m <sup>-2</sup> •h <sup>-1</sup>  |
| [5]       | Balsa wood carbonization                                               | 450 °C sintering                 | Solar desalination                      | 1.52 kg•m <sup>-2</sup> •h <sup>-1</sup>  |
| [6]       | Graphene oxide-poly (ethyleneimine)-melamine foam                      | Dip-coating                      | Solar desalination                      | 1.392 kg•m <sup>-2</sup> •h <sup>-1</sup> |
| [7]       | Bi <sub>2</sub> WO <sub>6</sub> /CdS heterojunction                    | Solvothermal method              | Pollutant degradation                   | ----                                      |

|            |                                                                                                                              |                                        |                                                               |                                          |
|------------|------------------------------------------------------------------------------------------------------------------------------|----------------------------------------|---------------------------------------------------------------|------------------------------------------|
| [8]        | Bi <sub>2</sub> WO <sub>6</sub> /BiOBr/RGO heterojunction                                                                    | Hydrothermal method                    | Pollutant degradation                                         | ----                                     |
| [9]        | Superhydrophobic SiO <sub>2</sub> -TiO <sub>2</sub> fabric                                                                   | Dip-coating                            | Oil/water separation                                          | ----                                     |
| [10]       | Melamine-graphene aerogel                                                                                                    | Freeze-drying                          | Oil removal                                                   | ----                                     |
| This paper | Devices assembled by PDVB/SiO <sub>2</sub> /Bi <sub>2</sub> WO <sub>6</sub> floating layer, filter paper layer and CuO layer | Polymerization and Solvothermal method | Pollutant degradation, oil removal and water steam generation | 1.53 kg•m <sup>-2</sup> •h <sup>-1</sup> |

## References

- [1] X.F. Xiao, L.Q. Pan, B. Chen, T. Chen, Y.G. Wang, Q. Zhang, L.P. Ren and W.L. Xu, Chem. Eng. J., 2023, DOI: <https://doi.org/10.1016/j.cej.2022.140777>.
- [2] X.L. Xu, D.Q. Fan, H. Zhang, J.P. Jing, Y. Lu and X.F. Yang, Compos. Commun., 2023, 37, 101438.
- [3] C.L. Guo, W.T. Zhang, K. Liu, T.X. Zhang, Q. Liu, H.X. Cao and L. Li, Appl. Therm. Eng., 2023, 221, 119837.
- [4] B.J. Ku, D.H. Kim, A.S. Yasin, A. Mnoyan, M.J. Kim, Y.J. Kim, H. Ra and K. Lee, J. Colloid Interf. Sci., 2023, 634, 543-552.
- [5] Y.J. Zhao, D.Y. You, W.T. Yang, H. Yu, Q.H. Pan and S.Y. Song, Environ. Sci.:

Water Res. Technol., 2022, 8, 151-161.

[6] Z. Yang, L. Chen, K.J. Yang, C. Chen, Y.Y. Zhang, S. Li, C.H. Chu, X.Y. Zhu and B.L. Chen, *J. Mater. Chem. A*, 2022, 10, 24373-24380.

[7] Y.Y. Zhang, L.X. Shi, X.G. Sun, L.S. Duan, Q.L. Li, Z.G. Huang, R.Q. Ding, X.X. Ban and D.E. Zhang, *Cata. Sci. Technol.*, 2022, 12, 7038-7047.

[8] X.L. Wu, J. Xu, P.F. Zhu, M. Liu, M. Duan and S.S. Zhang, *Dalton Trans.*, 2022, 51, 17994-18009.

[9] Z. Xiong, J. Huang, Y.Z. Wu and X. Gong, *Nanoscale*, 2022, 14, 5840-5850.

[10] R.Q. Zhang and Q.H. Meng, *New J. Chem.*, 2023, DOI: 10.1039/D2NJ05828F.
